# Supplementary material
Source: PubMed Central journal article supplement (PMC3273379)
Supplement: emboj2011425s1.pdf [file emboj2011425s1.pdf]

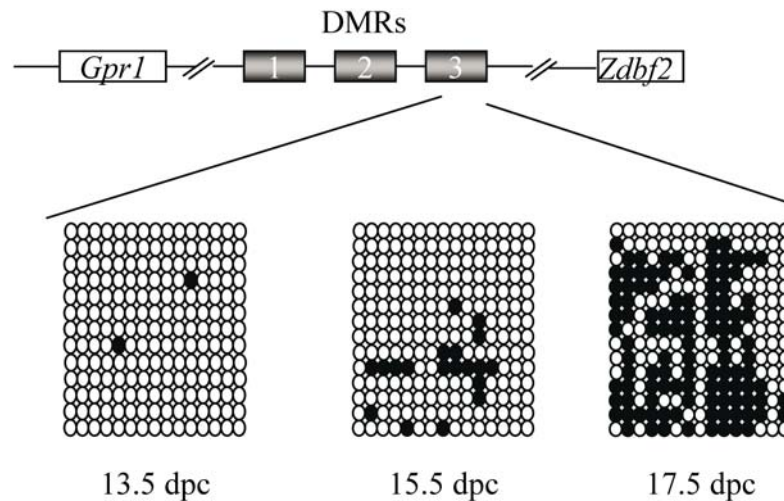

**Supplementary Figure S1.** DNA methylation acquisition at *Zdbf2* DMR3 in male germ cells. The *Gpr1-Zdbf2* imprinted locus has a tripartite DMR structure (*i.e.*, DMR1, DMR2 and DMR3; Hiura et al, 2010 *Nucl Acids Res* **38**, 4929). Bisulphite sequencing data are shown for DMR3, on 13.5 dpc, 15.5 dpc and 17.5 dpc male germ cells. Each horizontal row of circles represents the CpGs on an individual chromosome. Methylated CpGs are depicted as solid circles, unmethylated CpGs as open circles. Maternal and paternal alleles were not distinguished in this assay.

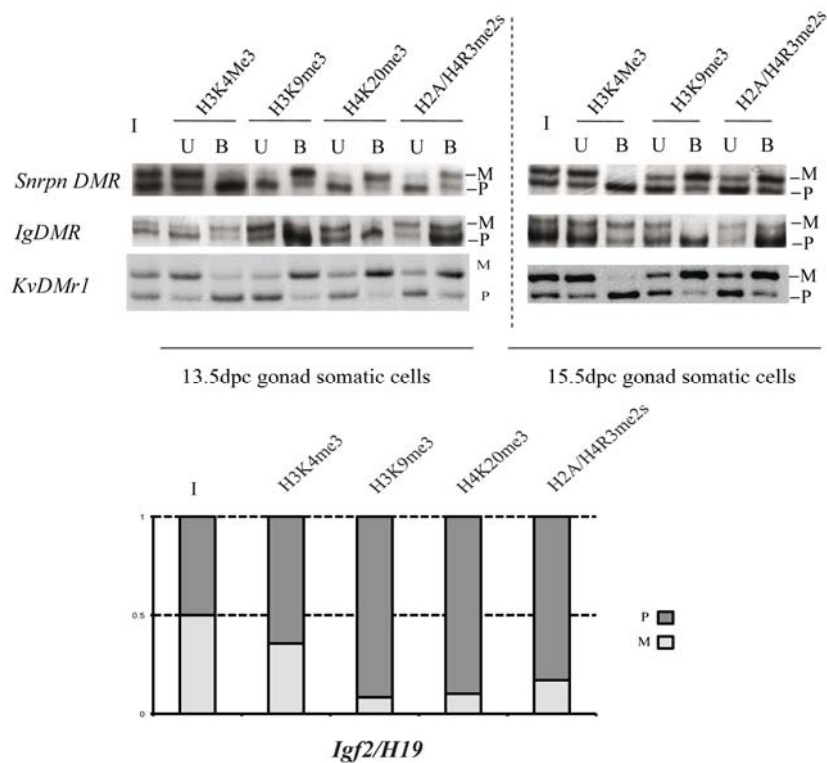

**Supplementary Figure S2.** Allelic precipitation of histone modifications at ICRs in FACS-sorted somatic control cells. SSCP-based allelic discrimination following cChIP on (C57Bl/6J x JF1)F1 somatic cells (GFP-negative FACS-sorted cells) isolated from 13.5 dpc (left panel) and 15.5 dpc (right panel) male gonads. Representative results on the *Snrpn* DMR, Ig-DMR and KvDMR1 are shown. The lower panel shows results on the *H19* DMR (in 13.5 dpc somatic cells), obtained with an allelic real-time PCR-based discrimination assay. I, input chromatin; B, antibody-bound chromatin; U, unbound fraction; M, maternal allele; P, paternal allele. Note that the allelic assessment of H3K4me3 at the *H19* DMR is not informative since precipitation was at background levels only.

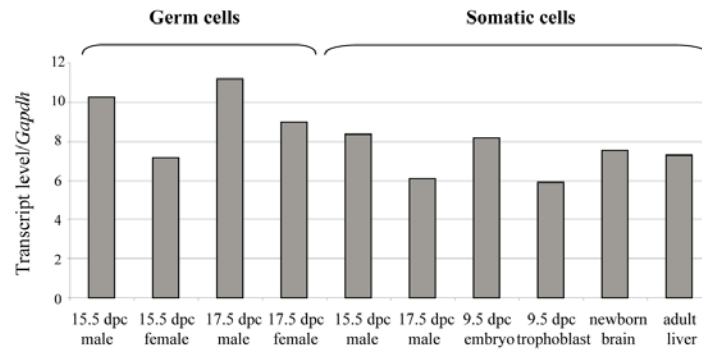

**Supplementary Figure S3.** *Rpl30* is highly expressed in male and female germ cells. Expression of *Rpl30* in germ cells (left panel), and somatic cells and tissues (right panel), analysed by quantitative RT-PCR. Graphs show the level of expression after normalization to the expression of *Gapdh*. The PCR primers used are described in Table SI.

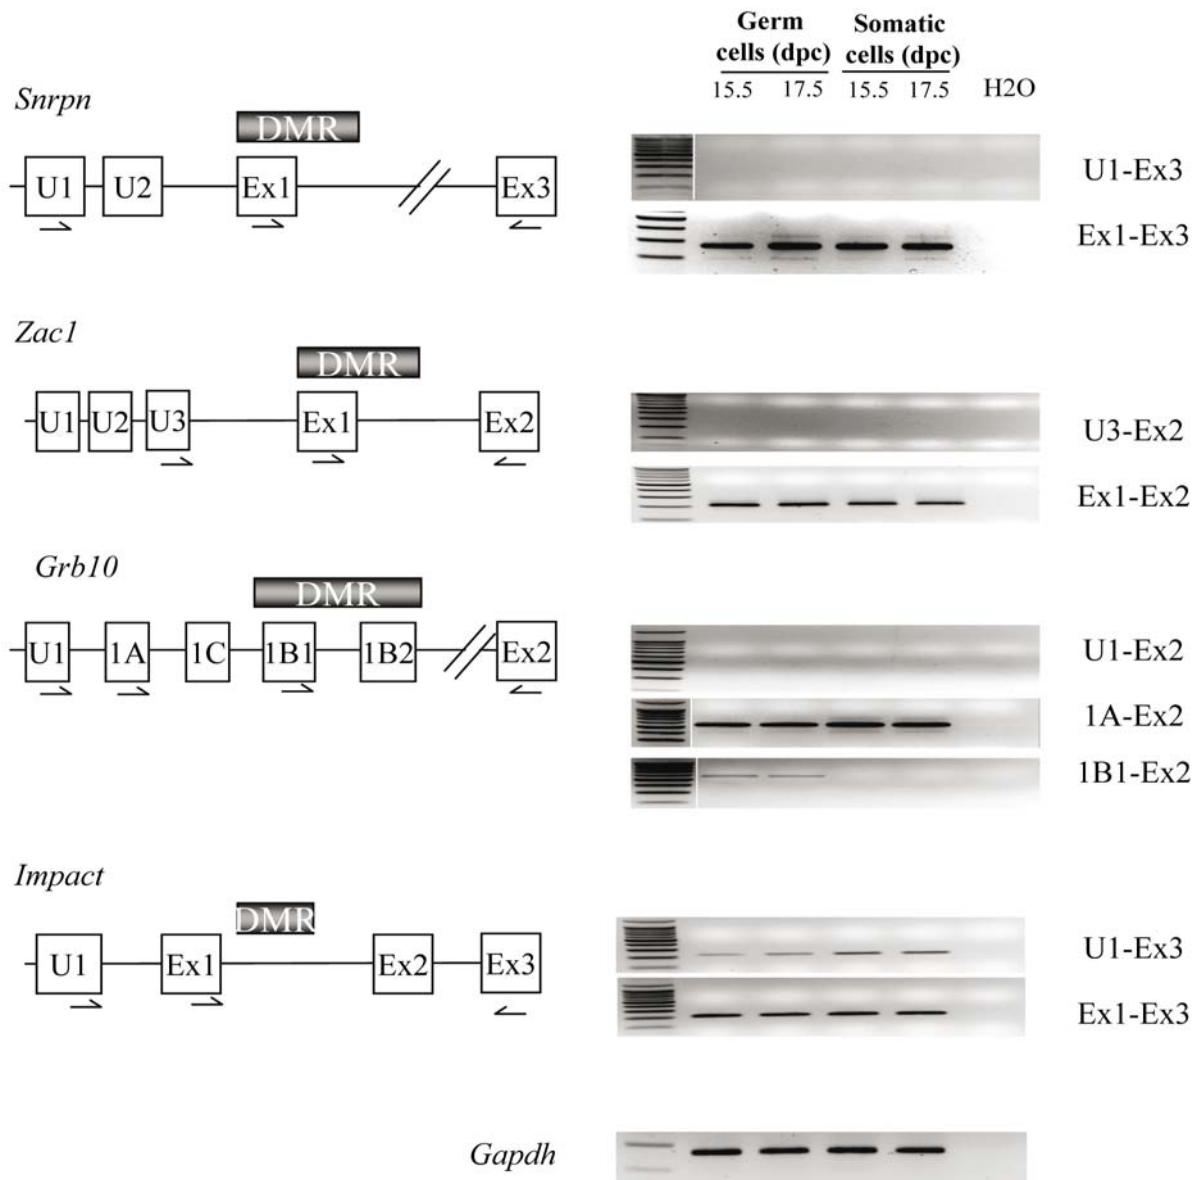

**Supplementary Figure S4.** Maternally-methylated ICRs are active promoters in foetal male germ cells. Promoter-specific RT-PCR analysis of male germ cells, and somatic control cells isolated from 15.5 and 17.5 dpc fetuses. Four loci known to be controlled by maternal ICRs were analysed by RT-PCR amplification (with 35 PCR cycles), followed by agarose gel electrophoresis, ethidium bromide staining of the gel, and gel imaging (Syngene scanning system). The four regions (DMRs) are all methylated on the maternal allele in somatic cells (Kobayashi H. *et al*, 2006; *Cytogenet Genome Res* 113, 130-137). At the *Snrpn* locus, no transcription is detected from upstream exon 1 (u1), but transcripts are readily amplified (from both parental alleles) between *Snrpn* exons 1 and 3 (Ex1-Ex3) indicating promoter activity of the DMR. Also at the *Zac1* locus, exon1-exon2 amplification was readily achieved (from both alleles), but not from upstream exons that are transcribed in somatic cells. In the embryo, the promoter 1B1 at the *Grb10* ICR is active in developing brain only (Sanz *et al*, 2008; *EMBO J* 27, 2523-2532). Transcription is detected in male germ cells as well. Additionally, the upstream 1A promoter is also active in male germ cells. At the *Impact* imprinted locus, transcription is detected at exon 1 within the DMR, and at the upstream exon U1.

### A) H19 DMR

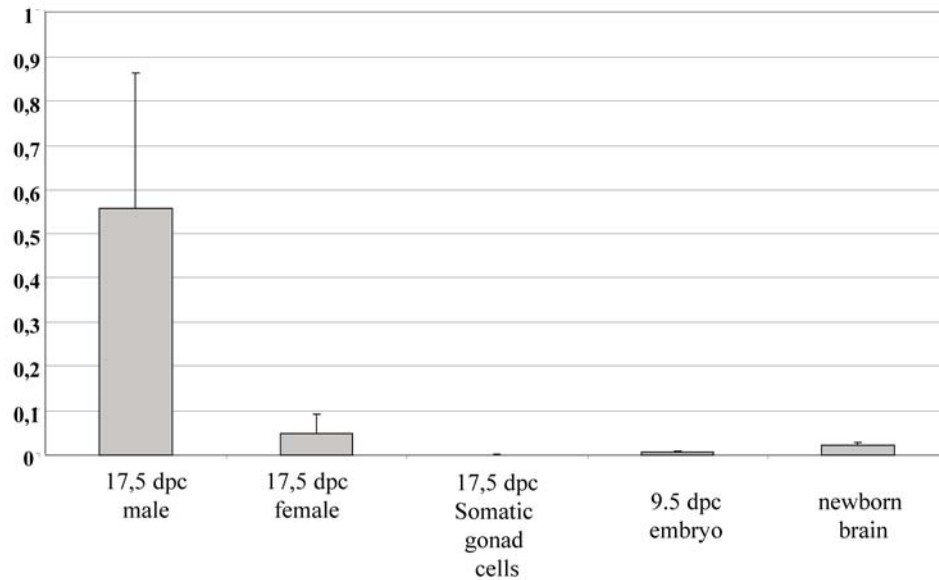

### B) Ig-DMR

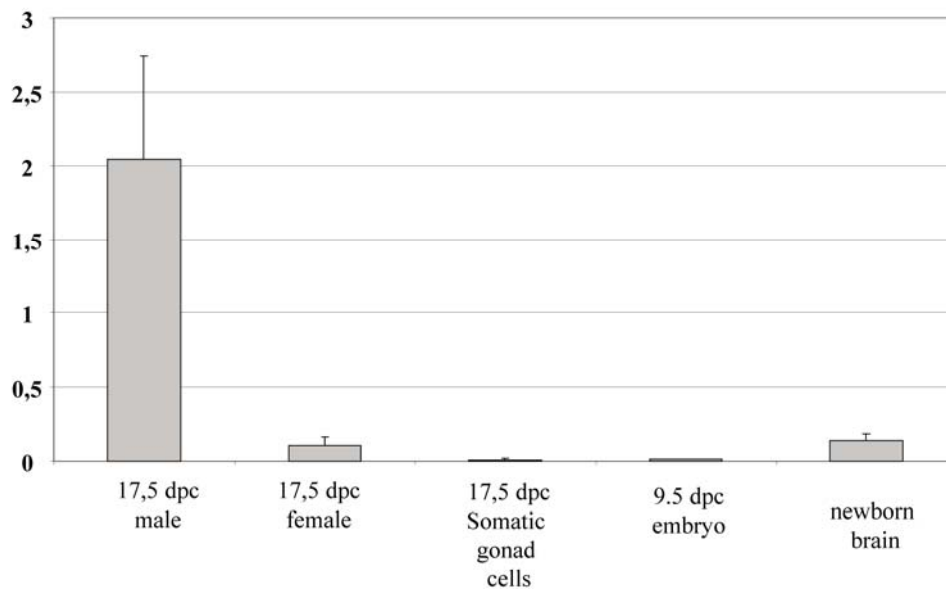

**Supplementary Figure S5.** Transcription across the *H19* DMR and *Ig-DMR* is predominant in male germ cells. Expression of *H19* DMR and *Ig-DMR* was analysed by quantitative RT-PCR in germ cells, whole 9.5 dpc embryos and newborn brain, as indicated. Graphs show the level of expression after normalization to that of *Gapdh*.

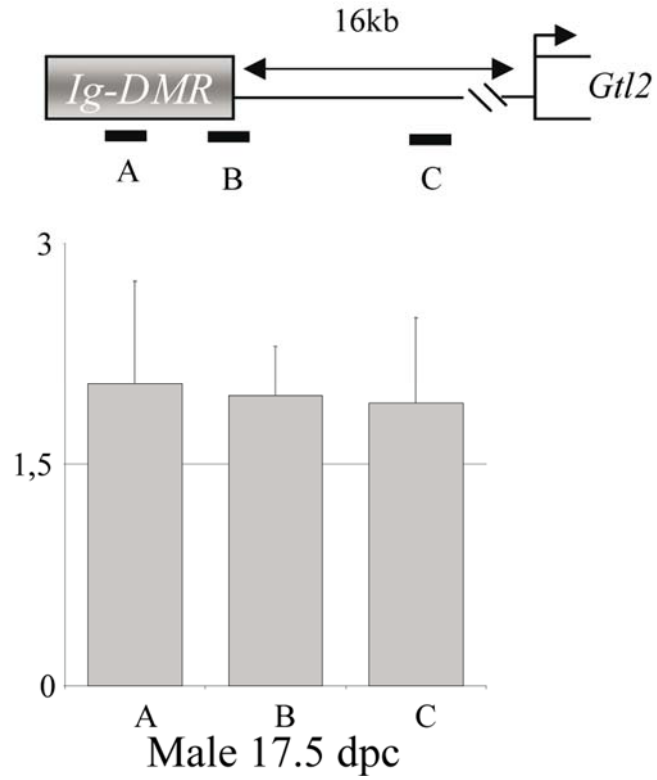

**Supplementary Figure S6.** Characterization of *Ig-DMR* non-coding RNAs in male germ cells. Quantitative RT-PCR analysis of regions located between the *Ig-DMR* and the *Gtl2* gene in male 17.5 dpc germ cells. Three regions were analysed (A, B, C; black bars). Measured levels of transcripts for each of the analysed regions are normalized to that of *Gapdh*.

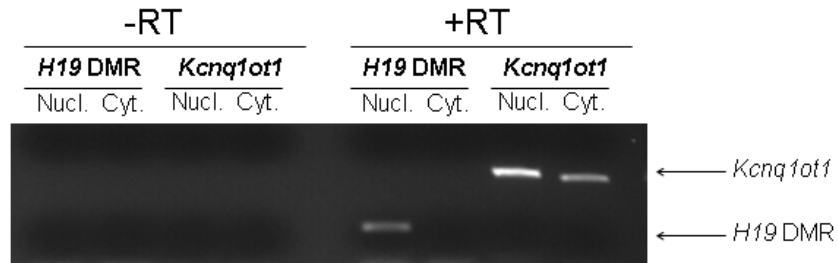

**Supplementary Figure S7.** Predominantly nuclear localisation of the *H19* DMR transcript. Cytoplasmic (Cyt.) and nuclear (Nucl.) RNA fractions were extracted from male primordial germ cells, according to Jablonski and Caputi (2009) *J Virol* 83:981-992. Briefly, ~25,000 FACS-sorted male germ cells were resuspended in (10 mM NaCl, 2 mM MgCl<sub>2</sub>, 10 mM Tris-HCl, pH 7.8, 5 mM dithiothreitol, 0.5% Igepal CA-630) and incubated on ice for 5 min. Nuclear pellet and cytoplasmic supernatant were collected by centrifugation at 8000 rpm for 5 min at 4°C. Total RNA was then isolated from the collected fractions using Trizol reagent (Invitrogen), and were treated with DNaseI (Roche). 100 ng of nuclear and cytoplasmic RNA was reverse transcribed using random hexamers and Superscript III (Invitrogen). 1 µl of cDNA was used for PCR amplification using primers at the 5' side of the *H19* DMR (*H19* DMR) and at the *Kcnq1ot1* nc-RNA, which is predominantly nuclear in localisation (Pandey *et al.* 2008; *Mol Cell* 32, 232-246). As a negative control, cDNAs were made without addition of reverse transcriptase (RT). PCR amplification products were migrated through an agarose gel, and then stained with ethidium bromide.

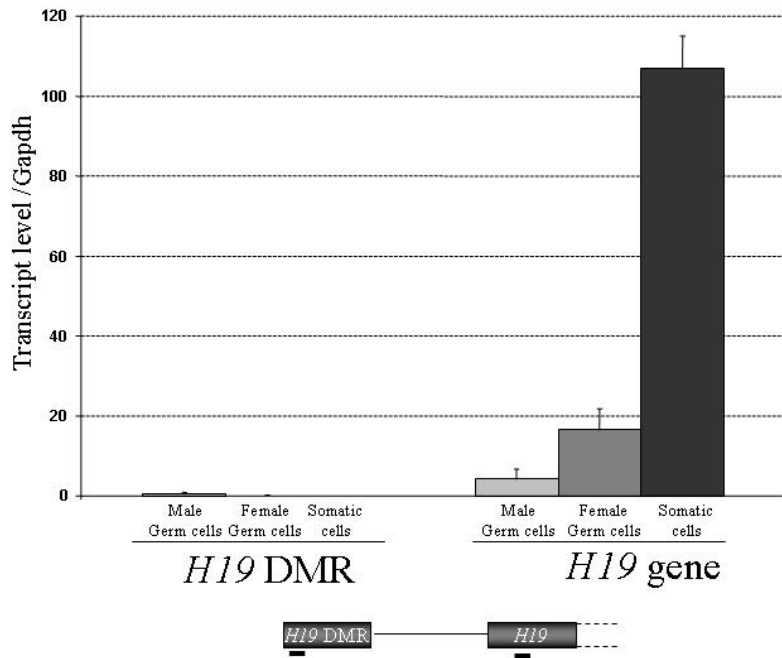

**Supplementary Figure S8.** Characterization of the level of expression of the *H19* DMR transcript and the *H19* gene transcript in male PGCs, female PGCs, and somatic control cells, at 15.5 dpc. Levels were determined by real-time PCR amplification, and are plotted relative to the expression of *Gapdh*.



**SUPPLEMENTARY TABLE S1**

**Primers used for Bisulphite analysis**

| <b>Region</b>        | <b>Primer Sequences</b>                                    | <b>Nucleotide position</b> | <b>Sequence ID</b> | <b>Allelic SNP (129Sv/B6 to JF1)</b>         | <b>Reference</b>       |
|----------------------|------------------------------------------------------------|----------------------------|--------------------|----------------------------------------------|------------------------|
| KvDMR1               | F: GATGGTGTATTTTGGTTTAGTTA<br>R: ATAACCTAATAATATAACCTCACC  | 1968-2181                  | AF119385           |                                              | This study             |
| <i>Snrpn</i><br>DMR  | F : ATTGGTGAGTTAATTTTTTGGGA<br>R : ACAAACTCCTACATCCTAAAA   | 68174- 68571               | AF332579           | G to A pos. 68314<br>A to G pos. 68479<br>in | Arnaud et al.,<br>2006 |
| <i>H19</i><br>DMR    | F :GTTGTGTAGATTTGGTTATAGT<br>R :TTCTCCTAATCTCTAATCTAA      | 3303-3690                  | AF049091           | T to Ø pos. 3476<br>C to A pos. 3534         | Arnaud et al.,<br>2006 |
| <i>Ig-DMR</i>        | F: TGTTGTGGTTTGTATGGGTA<br>R: TACAACCCTCCCTCACTCCAA        | 81248-81574                | AJ320506           | G to A pos. 81275<br>C to A pos. 81421       | This study             |
| <i>Zdbf2</i><br>DMR3 | F: GAAAGGTTGTGGATATGTTA<br>R: ATCAAAACATAACAAACCAAATATCCAA | 26492-26891                | AL669947           |                                              | Hiura et al., 2009     |

**Primers used for SSCP analysis**

| <b>Region</b>    | <b>Primer Sequences</b>                             | <b>Nucleotide position</b> | <b>Sequence ID</b> | <b>Allelic SNP (129Sv/B6 to JF1)</b>                       | <b>Reference</b>     |
|------------------|-----------------------------------------------------|----------------------------|--------------------|------------------------------------------------------------|----------------------|
| KvDMR1           | F: CGGATCACTTGAGCACTAC<br>R: GCCAAGTGGATCGCGCCAAG   | 2229-2467                  | AF119385           | T to C pos. 2392                                           | Henckel et al., 2009 |
| <i>Snrpn</i> DMR | F: AGGTTGTGACTGGGATCCTG<br>R: TGCAGCGGCAACAGAACTTCT | 68269- 68500               | AF332579           | G to A pos. 68314<br>A to G pos. 68479                     | Henckel et al., 2009 |
| Ig-DMR           | F:CTAAGGTACATCATGCTAGTGT<br>R: AGCATAGCATAGCGGCTGCA | 81248-81574                | AJ320506           | T to C pos.81242<br>G to A pos. 81275<br>C to A pos. 81421 | This study           |

**Primers used for quantitative allele-specific PCR analysis**

| <b>Region</b>  | <b>Primer Sequences</b>                                                                                       | <b>Nucleotide position</b> | <b>Sequence ID</b> | <b>Allelic SNP (129Sv/B6 to JF1)</b> | <b>Reference</b>     |
|----------------|---------------------------------------------------------------------------------------------------------------|----------------------------|--------------------|--------------------------------------|----------------------|
| <i>H19</i> DMR | F-129sv/B6 specific: CTTACGGAATGGTCCCCTTC<br>F-JF1 specific : CTTACGGAATTGGTCCCCTC<br>R: TAGGTTACCTGGGACATTGC | 3458-3643                  | AF049091           | T to Ø pos. 3476                     | Henckel et al., 2009 |

**Primers used for quantitative PCR analysis after Chlp**

| <b>Region</b>            | <b>Primer Sequences</b>                              | <b>Nucleotide position</b> | <b>Sequence ID</b> | <b>Reference</b>        |
|--------------------------|------------------------------------------------------|----------------------------|--------------------|-------------------------|
| KvDMR1                   | F: CGGATCACTTGAGCACTAC<br>R: GCCAAGTGGATCGCGCCAAG    | 2229-2467                  | AF119385           | Henckel et al.,<br>2009 |
| <i>Snrpn</i><br>DMR      | F: AGGTTGTGACTGGGATCCTG<br>R: TGCAGCGGCAACAGAACTTCT  | 68269- 68500               | AF332579.1         | Henckel et al.,<br>2009 |
| <i>H19</i><br>DMR        | F: GATCAGGCATTTGTGCACTTAC<br>R: TAGGTTACCTGGGACATTGC | 3441-3643                  | AF049091           | Henckel et al.,<br>2009 |
| Ig-DMR                   | F: GAAGACAAAGAGCAAGCCTGT<br>R: TAGACAACGGTGAGCCAGGAT | 82391-82587                | AJ320506           | Delaval et al.,<br>2007 |
| <i>Rpl30</i><br>promoter | F: AGCACGCCCAAGACAACGTCA<br>R: TGTGCGGTAGTTGGTTGCTA  | 25388787-<br>25388559      | NT039618.7         | This study              |
| IAPs                     | F: TATGCCGAGGGTGGTTCTCTA<br>R: TGCGGCAAAACTTTATTGCTT | non applicable             | non applicable     | Delaval et al.,<br>2007 |

Primers used for quantitative RT-PCR analysis

| Region         | Primer sequences                                                                                                                      | Nucleotide position | Sequence ID | Reference            |
|----------------|---------------------------------------------------------------------------------------------------------------------------------------|---------------------|-------------|----------------------|
| KvDMR1         | <u>Upstream of <i>Kcnq1-ot1</i> transcription start site (product K1):</u><br>F: GTCTCACACTTATTCAGAGTTA<br>R: GACAGATGGTGAATAATGACT   | 1600-1817           | AF119385    | This study           |
|                | <u>Downstream <i>Kcnq1-ot1</i> transcription start site (product K2):</u><br>F: CGGATCACTTGAGCACTAC<br>R: GCCAAGTGGATCGCGCCAAG        | 2229-2467           |             | Henckel et al., 2009 |
| <i>Snrpn</i>   | <u>DMR, Upstream of <i>Snrpn</i> transcription start site (product S1):</u><br>F: AT TTCCGCAGTA GGAATGCTCA<br>R: TCCATTGCTTGCAAATCACT | 67809-68053         | AF332579.1  | This study           |
|                | <u>Exon 5 (product S2) :</u><br>F: TGTGGGTAAGAGTAGCAAGA<br>R: TGATCTTCTGA ACTCATCACA                                                  | 515-664             | NM_013670   | This study           |
| <i>H19</i> DMR | <u>Upstream part of DMR (product A):</u><br>F: TCGGACTCCCAAATCAACAAGGTC<br>R: CCTGGCCTCATGAAGCCCATC                                   | 1791-1976           | AF049091    | This study           |
|                | <u>Downstream part of DMR (product B):</u><br>F: GATCAGGCATTTGTGCACTTAC<br>R: TAGGTTACCTGGGACATTGC                                    | 3441-3643           |             | Henckel et al., 2009 |
|                | <u>Between DMR and the <i>H19</i> gene (product C):</u><br>F: GAAGTATAGGGGAGTATAGCA<br>R: TGATCCTTTTCAGAGATCGGT                       | 4159-4356           |             | This study           |

|                            |                                                                                                                                                                                                                                                                                                                                                                 |                       |            |                      |
|----------------------------|-----------------------------------------------------------------------------------------------------------------------------------------------------------------------------------------------------------------------------------------------------------------------------------------------------------------------------------------------------------------|-----------------------|------------|----------------------|
|                            | <u>Between DMR and the <i>H19</i> gene (product C'):</u><br>F: ACTAGGCTGAGGATCTGCCAAG<br>R: CTCTGTCAACCAATCAGTACAT<br><br><u>Between DMR and the <i>H19</i> gene ( product D):</u><br>F: TCATACTCCGTGGGATAGTATG<br>R: ATATAGCCCCGTAGCCTGCT<br><br><u>5' part of <i>H19</i> transcript ( product E):</u><br>F: AGCAAAGGCATCGCAAAGGCT<br>R: TTGCTAACTATCCTGCCTTTC | 4581-5452             |            | This study           |
|                            |                                                                                                                                                                                                                                                                                                                                                                 | 5501-5247             |            | This study           |
|                            |                                                                                                                                                                                                                                                                                                                                                                 | 5673-6010             |            | This study           |
| Ig-DMR                     | <u>Upstream part of DMR:</u><br>F:CTAAGGTACATCATGCTAGTGT<br>R: AGCATAGCATAGCGGCTGCA<br><br><u>Downstream part of DMR:</u><br>F: GAAGACAAAGAGCAAGCCTGT<br>R: TAGACAACGGTGAGCCAGGAT                                                                                                                                                                               | 81248-81574           |            | This study           |
|                            |                                                                                                                                                                                                                                                                                                                                                                 | 82391-82587           | AJ320506   | Delaval et al., 2007 |
| <i>Gapdh</i><br>transcript | F: ACAGTCCATGCCATCACTGCC<br>R: GCCTGCTTCACCACCTTCTTG                                                                                                                                                                                                                                                                                                            | 574-798               | NM_008084  | This study           |
| <i>Rpl30</i><br>transcript | F:AGTCTCTGGAGTCGATCAACT<br>R: AGCTGGACAGTTGTTGGCAAG                                                                                                                                                                                                                                                                                                             | 25388011-<br>25388148 | NT039618.7 | This study           |

## SUPPLEMENTARY TABLE S2

### Details on antisera used in this study

| <b>Antibody</b>  | <b>Company</b> | <b>N° cat</b> | <b>Lot</b>          |
|------------------|----------------|---------------|---------------------|
| H3K4me3          | Diagenode      | PAb-030-050   | 001                 |
| H4K20me3         | Millipore      | 07-463        | 31392               |
| H3K9me3          | Millipore      | 07-442        | 33453<br>JBC1361819 |
| H2A/H4R3me2s     | Abcam          | ab5823        | 97454<br>520317     |
| Anti-chicken IgY | Sigma          | C-2288        | 083K4856            |
